# Supplementary material for: Headspace analyses using multi-capillary column-ion mobility spectrometry allow rapid pathogen differentiation in hospital-acquired pneumonia relevant bacteria
Source: PubMed Central journal article supplement (PMC7916313; doi:10.1186/s12866-021-02102-8), 2021-02-28

**Headspace analyses using multi-capillary column-ion mobility spectrometry  
allow rapid pathogen differentiation in hospital-acquired pneumonia relevant  
bacteria**

**Supplementary Material**

Nils Kunze-Szikszay<sup>1\*</sup>; E-Mail; nils.kunze@med.uni-goettingen.de

Telephone: 0049 551 3967707; Telefax: 0049 551 3966039

Maximilian Euler<sup>1</sup>; E-Mail: maximilian.euler@med.uni-goettingen.de

Martin Kuhns<sup>2</sup>; E-Mail: mkuhns@gmx.de

Melanie Thieß<sup>3</sup>; E-Mail: melanie.thiess@uni-hamburg.de

Uwe Groß<sup>2</sup>; E-Mail: ugross@gwdg.de

Michael Quintel<sup>1</sup>; E-Mail: mquintel@med.uni-goettingen.de

Thorsten Perl<sup>4</sup>; E-Mail: tperl@gwdg.de

\*corresponding author

<sup>1</sup> Department of Anesthesiology, University Medical Center Göttingen, Robert-Koch-Straße 40,  
37075 Göttingen, Germany

<sup>2</sup> Institute for Medical Microbiology, University of Göttingen, Kreuzbergring 57, 37075 Göttingen,  
Germany

<sup>3</sup> Institute of Plant Science and Microbiology, Molecular Plant Genetics, University of Hamburg,  
Ohnhornstraße 18, 22609 Hamburg, Germany

<sup>4</sup> Department of General, Visceral and Pediatric Surgery, University Medical Center Göttingen,  
Robert-Koch-Straße 40, 37075 Göttingen, Germany

*Caption supplementary figure:* Flowchart illustrating the workflow of the experiments.

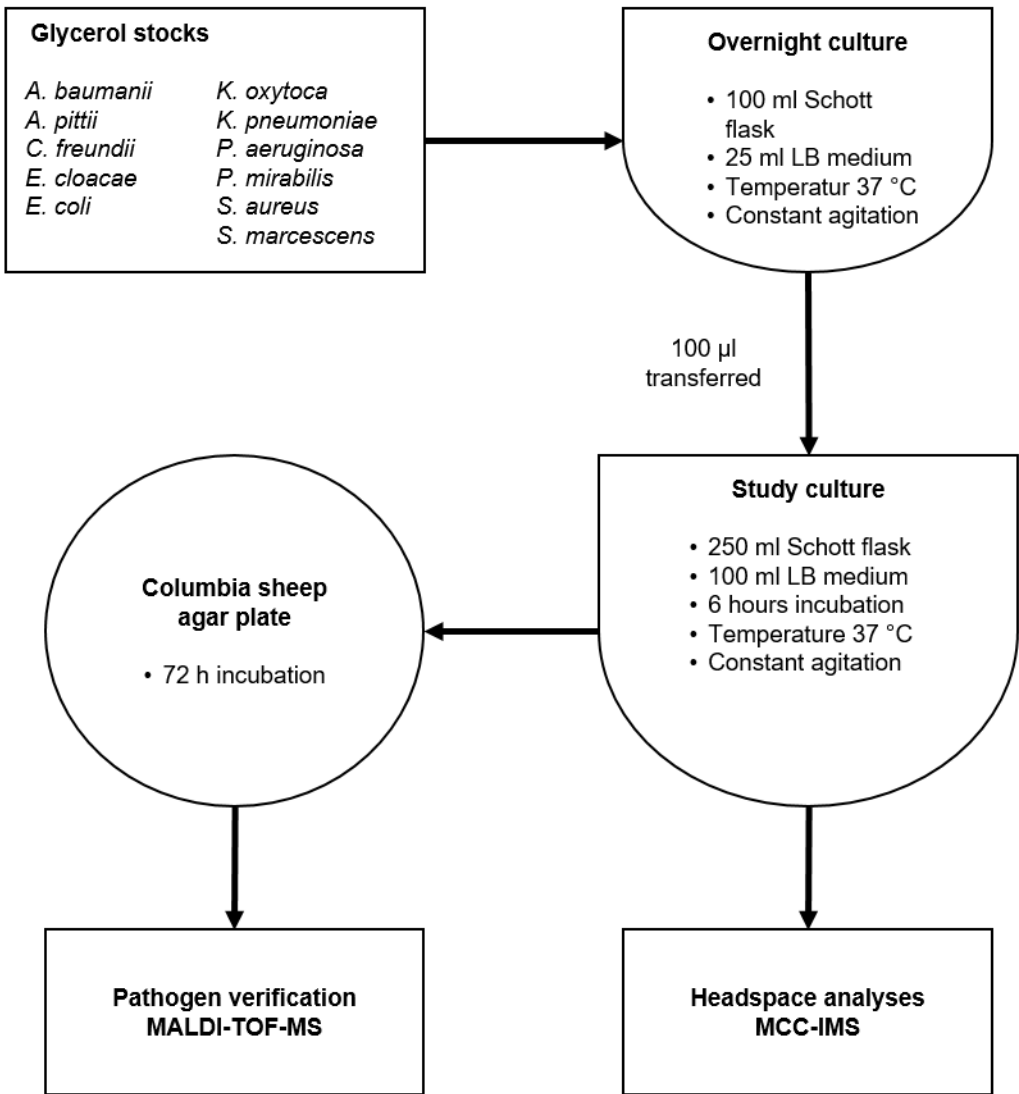

Supplement: 12866_2021_2102_MOESM1_ESM.pdf [file 12866_2021_2102_MOESM1_ESM.pdf]
